# Supplementary material
Source: Research Square preprint supplement (doi:10.21203/rs.3.rs-8911970/v1)
Supplement: Supplementary file 1 [file 8c6ae6437d455ad1c185ebb5.docx]

**Title:** Qualitative perspectives of early surgeon users on the value of the daVinci 5 surgical system

**Authors**: Derek J. Erstad, MDa,b, Zahra A Fazal, MScc, Karlis Draulis, Bsc, Feibi Zheng, MDc, Gretchen Jackson, PhDc,d , Christy Chai, MDa,b

**Affiliations**

a Division of Surgical Oncology, Baylor College of Medicine, Houston, Texas

b General Surgery and Surgical Oncology, Michael E. DeBakey VA Medical Center, Houston, Texas

c Intuitive Surgical Inc, Sunnyvale, California

d Department of Pediatric Surgery, Vanderbilt University Medical Center, Nashville, Tennessee

**Corresponding Author**

Dr. Christy Chai, MD, FACS, FSSO

Associate Professor of Surgery

Division of Surgical Oncology

Baylor College of Medicine

2002 Holcombe Blvd, OCL 112

Houston, TX 77030

United States

[chirsty.chai@bcm.edu](mailto:chirsty.chai@bcm.edu)

**Statements and Declarations:**
Funding Support*:* Intuitive Surgical Inc. funded participant honorariums for the study, open-access publication fees and employed a third-party vendor to handle recruitment.

Competing Interests: Authors DE and CC have no competing interests to declare. Authors ZF, KD, FZ, and GJ report being employed by Intuitive Surgical during the conduct of the study.

Author Contributions: Conceptualization: FZ, ZAF, GJ, KD. Methodology: FZ, ZAF. Data curation: ZAF, KD. Formal analysis: ZAF. Validation: KD. Writing, Original Draft: ZAF. Writing – Review & Editing: FZ, GJ, KD, DE, CC.

Ethics approval: This study was performed in line with the principles of the Declaration of Helsinki. IRB approval was granted by the WCG Institutional Review Board (IRB) (#20233310) on 11/2024 which also included approval of the methodology and the interview questions.

Consent to participate: Written and verbal consent were both obtained from each individual participant in this study.

Consent to publish: Given that the qualitative results are de-identified and not linked to any particular participant, consent to publish was not required. However, participants were aware of the possibility of their quotes being included and used in the manuscript.

Data availability statement: De-identified data from this study is available upon reasonable request to the corresponding author
